# Supplementary material
Source: PubMed Central journal article supplement (PMC6743723)
Supplement: NIHMS1049257-supplement-Supplemental_Appendix.pdf [file NIHMS1049257-supplement-Supplemental_Appendix.pdf]

**SUPPLEMENTAL APPENDIX:**

*Appendix A: PROMIS questions provided to pediatric participants in CureGN:*

**[PROMIS Global Health Scale: Standard Fixed Length Short-Form]**

| <b>Please respond to each item by marking one box per row.</b>                                        | <b>Excellent</b>              | <b>Very good</b>              | <b>Good</b>                   | <b>Fair</b>                   | <b>Poor</b>                   |
|-------------------------------------------------------------------------------------------------------|-------------------------------|-------------------------------|-------------------------------|-------------------------------|-------------------------------|
| 11. In general, would you say your health is:                                                         | <input type="checkbox"/><br>5 | <input type="checkbox"/><br>4 | <input type="checkbox"/><br>3 | <input type="checkbox"/><br>2 | <input type="checkbox"/><br>1 |
| 12. In general, would you say your quality of life is:                                                | <input type="checkbox"/><br>5 | <input type="checkbox"/><br>4 | <input type="checkbox"/><br>3 | <input type="checkbox"/><br>2 | <input type="checkbox"/><br>1 |
| 13. In general, how would you rate your physical health?                                              | <input type="checkbox"/><br>5 | <input type="checkbox"/><br>4 | <input type="checkbox"/><br>3 | <input type="checkbox"/><br>2 | <input type="checkbox"/><br>1 |
| 14. In general, how would you rate your mental health, including your mood and your ability to think? | <input type="checkbox"/><br>5 | <input type="checkbox"/><br>4 | <input type="checkbox"/><br>3 | <input type="checkbox"/><br>2 | <input type="checkbox"/><br>1 |
| <b>In the past 7 days...</b>                                                                          | <b>Always</b>                 | <b>Often</b>                  | <b>Sometimes</b>              | <b>Rarely</b>                 | <b>Never</b>                  |
| 15. How often do you feel really sad?                                                                 | <input type="checkbox"/><br>1 | <input type="checkbox"/><br>2 | <input type="checkbox"/><br>3 | <input type="checkbox"/><br>4 | <input type="checkbox"/><br>5 |
| 16. How often do you have fun with friends?                                                           | <input type="checkbox"/><br>5 | <input type="checkbox"/><br>4 | <input type="checkbox"/><br>3 | <input type="checkbox"/><br>2 | <input type="checkbox"/><br>1 |
| 17. How often do your parents listen to your ideas?                                                   | <input type="checkbox"/><br>5 | <input type="checkbox"/><br>4 | <input type="checkbox"/><br>3 | <input type="checkbox"/><br>2 | <input type="checkbox"/><br>1 |

**[PROMIS Anxiety: Single Item from Standard 8 Item Short Form]**

| <b>In the past 7 days...</b> | <b>Never</b>                  | <b>Almost Never</b>           | <b>Sometimes</b>              | <b>Often</b>                  | <b>Almost Always</b>          |
|------------------------------|-------------------------------|-------------------------------|-------------------------------|-------------------------------|-------------------------------|
| 19. I felt worried           | <input type="checkbox"/><br>0 | <input type="checkbox"/><br>1 | <input type="checkbox"/><br>2 | <input type="checkbox"/><br>3 | <input type="checkbox"/><br>4 |

**[PROMIS Fatigue: Standard Fixed Length Short-Form]**

| <b>In the past 7 days...</b>                                                               | <b>Never</b>                  | <b>Almost Never</b>           | <b>Sometimes</b>              | <b>Often</b>                  | <b>Almost Always</b>          |
|--------------------------------------------------------------------------------------------|-------------------------------|-------------------------------|-------------------------------|-------------------------------|-------------------------------|
| 21. Being tired made it hard for me to play or go out with my friends as much as I'd like. | <input type="checkbox"/><br>0 | <input type="checkbox"/><br>1 | <input type="checkbox"/><br>2 | <input type="checkbox"/><br>3 | <input type="checkbox"/><br>4 |
| 22. I felt weak.                                                                           | <input type="checkbox"/><br>0 | <input type="checkbox"/><br>1 | <input type="checkbox"/><br>2 | <input type="checkbox"/><br>3 | <input type="checkbox"/><br>4 |
| 23. I got tired easily.                                                                    | <input type="checkbox"/><br>0 | <input type="checkbox"/><br>1 | <input type="checkbox"/><br>2 | <input type="checkbox"/><br>3 | <input type="checkbox"/><br>4 |
| 24. Being tired made it hard for me to keep up with my schoolwork.                         | <input type="checkbox"/><br>0 | <input type="checkbox"/><br>1 | <input type="checkbox"/><br>2 | <input type="checkbox"/><br>3 | <input type="checkbox"/><br>4 |
| 25. I had trouble finishing things because I was too tired.                                | <input type="checkbox"/><br>0 | <input type="checkbox"/><br>1 | <input type="checkbox"/><br>2 | <input type="checkbox"/><br>3 | <input type="checkbox"/><br>4 |
| 26. I had trouble starting things because I was too tired.                                 | <input type="checkbox"/><br>0 | <input type="checkbox"/><br>1 | <input type="checkbox"/><br>2 | <input type="checkbox"/><br>3 | <input type="checkbox"/><br>4 |

|                                                         |                               |                               |                               |                               |                               |
|---------------------------------------------------------|-------------------------------|-------------------------------|-------------------------------|-------------------------------|-------------------------------|
| 27. I was so tired it was hard for me to pay attention. | <input type="checkbox"/><br>0 | <input type="checkbox"/><br>1 | <input type="checkbox"/><br>2 | <input type="checkbox"/><br>3 | <input type="checkbox"/><br>4 |
| 28. I was too tired to do sports or exercise.           | <input type="checkbox"/><br>0 | <input type="checkbox"/><br>1 | <input type="checkbox"/><br>2 | <input type="checkbox"/><br>3 | <input type="checkbox"/><br>4 |
| 29. I was too tired to do things outside.               | <input type="checkbox"/><br>0 | <input type="checkbox"/><br>1 | <input type="checkbox"/><br>2 | <input type="checkbox"/><br>3 | <input type="checkbox"/><br>4 |
| 30. I was too tired to enjoy the things I like to do.   | <input type="checkbox"/><br>0 | <input type="checkbox"/><br>1 | <input type="checkbox"/><br>2 | <input type="checkbox"/><br>3 | <input type="checkbox"/><br>4 |

**[PROMIS Mobility: Four Items from Standard 8 Item Short Form]**

| <b>In the past 7 days.....</b>                                      | <b>With no trouble</b>        | <b>With a little trouble</b>  | <b>With some trouble</b>      | <b>With a lot of trouble</b>  | <b>Not able to do</b>         |
|---------------------------------------------------------------------|-------------------------------|-------------------------------|-------------------------------|-------------------------------|-------------------------------|
| 31. I could do sports and exercise that other kids my age could do. | <input type="checkbox"/><br>4 | <input type="checkbox"/><br>3 | <input type="checkbox"/><br>2 | <input type="checkbox"/><br>1 | <input type="checkbox"/><br>0 |
| 32. I could keep up when I played with other kids.                  | <input type="checkbox"/><br>4 | <input type="checkbox"/><br>3 | <input type="checkbox"/><br>2 | <input type="checkbox"/><br>1 | <input type="checkbox"/><br>0 |
| 33. I could walk up stairs without holding on to anything.          | <input type="checkbox"/><br>4 | <input type="checkbox"/><br>3 | <input type="checkbox"/><br>2 | <input type="checkbox"/><br>1 | <input type="checkbox"/><br>0 |
| 34. I have been physically able to do the activities I enjoy most.  | <input type="checkbox"/><br>4 | <input type="checkbox"/><br>3 | <input type="checkbox"/><br>2 | <input type="checkbox"/><br>1 | <input type="checkbox"/><br>0 |

**Appendix B: PROMIS questions provided to adult participants in CureGN:**

**[PROMIS Global Health Scale: Standard Fixed Length Short-Form]**

| <b>Please respond to each item by marking one box per row.</b>                                                                                                                                                                        | <b>Excellent</b>              | <b>Very good</b>              | <b>Good</b>                   | <b>Fair</b>                   | <b>Poor</b>                   |                               |                               |                               |                               |                               |                                |
|---------------------------------------------------------------------------------------------------------------------------------------------------------------------------------------------------------------------------------------|-------------------------------|-------------------------------|-------------------------------|-------------------------------|-------------------------------|-------------------------------|-------------------------------|-------------------------------|-------------------------------|-------------------------------|--------------------------------|
| 11. In general, would you say your health is:                                                                                                                                                                                         | <input type="checkbox"/><br>5 | <input type="checkbox"/><br>4 | <input type="checkbox"/><br>3 | <input type="checkbox"/><br>2 | <input type="checkbox"/><br>1 |                               |                               |                               |                               |                               |                                |
| 12. In general, would you say your quality of life is:                                                                                                                                                                                | <input type="checkbox"/><br>5 | <input type="checkbox"/><br>4 | <input type="checkbox"/><br>3 | <input type="checkbox"/><br>2 | <input type="checkbox"/><br>1 |                               |                               |                               |                               |                               |                                |
| 13. In general, how would you rate your physical health?                                                                                                                                                                              | <input type="checkbox"/><br>5 | <input type="checkbox"/><br>4 | <input type="checkbox"/><br>3 | <input type="checkbox"/><br>2 | <input type="checkbox"/><br>1 |                               |                               |                               |                               |                               |                                |
| 14. In general, how would you rate your mental health, including your mood and your ability to think?                                                                                                                                 | <input type="checkbox"/><br>5 | <input type="checkbox"/><br>4 | <input type="checkbox"/><br>3 | <input type="checkbox"/><br>2 | <input type="checkbox"/><br>1 |                               |                               |                               |                               |                               |                                |
| 15. In general, how would you rate your satisfaction with your social activities and relationships?                                                                                                                                   | <input type="checkbox"/><br>5 | <input type="checkbox"/><br>4 | <input type="checkbox"/><br>3 | <input type="checkbox"/><br>2 | <input type="checkbox"/><br>1 |                               |                               |                               |                               |                               |                                |
| 16. In general, please rate how well you carry out your usual social activities and roles. (This includes activities at home, at work and in your community, and responsibilities as a parent, child, spouse, employee, friend, etc.) | <input type="checkbox"/><br>5 | <input type="checkbox"/><br>4 | <input type="checkbox"/><br>3 | <input type="checkbox"/><br>2 | <input type="checkbox"/><br>1 |                               |                               |                               |                               |                               |                                |
|                                                                                                                                                                                                                                       | <b>Completely</b>             | <b>Mostly</b>                 | <b>Moderately</b>             | <b>A little</b>               | <b>Not at all</b>             |                               |                               |                               |                               |                               |                                |
| 17. To what extent are you able to carry out your everyday physical activities such as walking, climbing stairs, carrying groceries, or moving a chair?                                                                               | <input type="checkbox"/><br>5 | <input type="checkbox"/><br>4 | <input type="checkbox"/><br>3 | <input type="checkbox"/><br>2 | <input type="checkbox"/><br>1 |                               |                               |                               |                               |                               |                                |
| <b>In the past 7 days...</b>                                                                                                                                                                                                          | <b>Never</b>                  | <b>Rarely</b>                 | <b>Sometimes</b>              | <b>Often</b>                  | <b>Always</b>                 |                               |                               |                               |                               |                               |                                |
| 18. How often have you been bothered by emotional problems such as feeling anxious, depressed or irritable?                                                                                                                           | <input type="checkbox"/><br>1 | <input type="checkbox"/><br>2 | <input type="checkbox"/><br>3 | <input type="checkbox"/><br>4 | <input type="checkbox"/><br>5 |                               |                               |                               |                               |                               |                                |
|                                                                                                                                                                                                                                       | <b>None</b>                   | <b>Mild</b>                   | <b>Moderate</b>               | <b>Severe</b>                 | <b>Very severe</b>            |                               |                               |                               |                               |                               |                                |
| 19. How would you rate your fatigue on average?                                                                                                                                                                                       | <input type="checkbox"/><br>1 | <input type="checkbox"/><br>2 | <input type="checkbox"/><br>3 | <input type="checkbox"/><br>4 | <input type="checkbox"/><br>5 |                               |                               |                               |                               |                               |                                |
|                                                                                                                                                                                                                                       | <b>No pain</b>                |                               |                               |                               |                               |                               |                               |                               |                               | <b>Worst imaginable pain</b>  |                                |
| 20. How would you rate your pain on average?                                                                                                                                                                                          | <input type="checkbox"/><br>0 | <input type="checkbox"/><br>1 | <input type="checkbox"/><br>2 | <input type="checkbox"/><br>3 | <input type="checkbox"/><br>4 | <input type="checkbox"/><br>5 | <input type="checkbox"/><br>6 | <input type="checkbox"/><br>7 | <input type="checkbox"/><br>8 | <input type="checkbox"/><br>9 | <input type="checkbox"/><br>10 |

**[PROMIS Anxiety]**

| In the past 7 days... | Never                         | Rarely                        | Sometimes                     | Often                         | Always                        |
|-----------------------|-------------------------------|-------------------------------|-------------------------------|-------------------------------|-------------------------------|
| 21. I felt worried    | <input type="checkbox"/><br>1 | <input type="checkbox"/><br>2 | <input type="checkbox"/><br>3 | <input type="checkbox"/><br>4 | <input type="checkbox"/><br>5 |

**[PROMIS Fatigue]**

| In the past 7 days...                                                    | Never                         | Rarely                        | Sometimes                     | Often                         | Always                        |
|--------------------------------------------------------------------------|-------------------------------|-------------------------------|-------------------------------|-------------------------------|-------------------------------|
| 23. How often did you feel tired?                                        | <input type="checkbox"/><br>1 | <input type="checkbox"/><br>2 | <input type="checkbox"/><br>3 | <input type="checkbox"/><br>4 | <input type="checkbox"/><br>5 |
| 24. How often did you experience extreme exhaustion?                     | <input type="checkbox"/><br>1 | <input type="checkbox"/><br>2 | <input type="checkbox"/><br>3 | <input type="checkbox"/><br>4 | <input type="checkbox"/><br>5 |
| 25. How often did you run out of energy?                                 | <input type="checkbox"/><br>1 | <input type="checkbox"/><br>2 | <input type="checkbox"/><br>3 | <input type="checkbox"/><br>4 | <input type="checkbox"/><br>5 |
| 26. How often did your fatigue limit you at work (include work at home)? | <input type="checkbox"/><br>1 | <input type="checkbox"/><br>2 | <input type="checkbox"/><br>3 | <input type="checkbox"/><br>4 | <input type="checkbox"/><br>5 |
| 27. How often were you too tired to think clearly?                       | <input type="checkbox"/><br>1 | <input type="checkbox"/><br>2 | <input type="checkbox"/><br>3 | <input type="checkbox"/><br>4 | <input type="checkbox"/><br>5 |
| 28. How often were you too tired to take a bath or shower?               | <input type="checkbox"/><br>1 | <input type="checkbox"/><br>2 | <input type="checkbox"/><br>3 | <input type="checkbox"/><br>4 | <input type="checkbox"/><br>5 |
| 29. How often did you have enough energy to exercise strenuously?        | <input type="checkbox"/><br>5 | <input type="checkbox"/><br>4 | <input type="checkbox"/><br>3 | <input type="checkbox"/><br>2 | <input type="checkbox"/><br>1 |

**[PROMIS Sleep]**

| In the past 7 days...                                   | Not at all                    | A little bit                  | Somewhat                      | Quite a bit                   | Very much                     |
|---------------------------------------------------------|-------------------------------|-------------------------------|-------------------------------|-------------------------------|-------------------------------|
| 30. I had problems during the day because of poor sleep | <input type="checkbox"/><br>1 | <input type="checkbox"/><br>2 | <input type="checkbox"/><br>3 | <input type="checkbox"/><br>4 | <input type="checkbox"/><br>5 |

**Appendix C: Edema self-assessment completed by CureGN participants:**

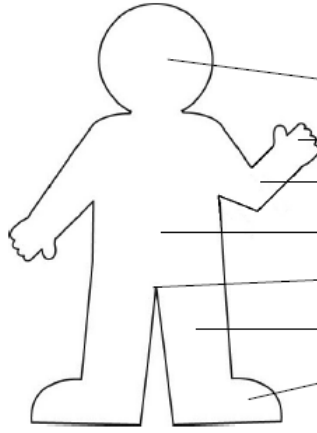

|                             | Absent                        |                               |                               |                               |                               |                               | Worst Imaginable |
|-----------------------------|-------------------------------|-------------------------------|-------------------------------|-------------------------------|-------------------------------|-------------------------------|------------------|
| 1. Swelling in your:        |                               |                               |                               |                               |                               |                               |                  |
| a. Whole body               | <input type="checkbox"/><br>0 | <input type="checkbox"/><br>1 | <input type="checkbox"/><br>2 | <input type="checkbox"/><br>3 | <input type="checkbox"/><br>4 | <input type="checkbox"/><br>5 |                  |
| b. Face or around your eyes | <input type="checkbox"/><br>0 | <input type="checkbox"/><br>1 | <input type="checkbox"/><br>2 | <input type="checkbox"/><br>3 | <input type="checkbox"/><br>4 | <input type="checkbox"/><br>5 |                  |
| c. Fingers or hands         | <input type="checkbox"/><br>0 | <input type="checkbox"/><br>1 | <input type="checkbox"/><br>2 | <input type="checkbox"/><br>3 | <input type="checkbox"/><br>4 | <input type="checkbox"/><br>5 |                  |
| d. Arms                     | <input type="checkbox"/><br>0 | <input type="checkbox"/><br>1 | <input type="checkbox"/><br>2 | <input type="checkbox"/><br>3 | <input type="checkbox"/><br>4 | <input type="checkbox"/><br>5 |                  |
| e. Stomach or abdomen       | <input type="checkbox"/><br>0 | <input type="checkbox"/><br>1 | <input type="checkbox"/><br>2 | <input type="checkbox"/><br>3 | <input type="checkbox"/><br>4 | <input type="checkbox"/><br>5 |                  |
| f. Genitalia                | <input type="checkbox"/><br>0 | <input type="checkbox"/><br>1 | <input type="checkbox"/><br>2 | <input type="checkbox"/><br>3 | <input type="checkbox"/><br>4 | <input type="checkbox"/><br>5 |                  |
| g. Legs                     | <input type="checkbox"/><br>0 | <input type="checkbox"/><br>1 | <input type="checkbox"/><br>2 | <input type="checkbox"/><br>3 | <input type="checkbox"/><br>4 | <input type="checkbox"/><br>5 |                  |
| h. Feet                     | <input type="checkbox"/><br>0 | <input type="checkbox"/><br>1 | <input type="checkbox"/><br>2 | <input type="checkbox"/><br>3 | <input type="checkbox"/><br>4 | <input type="checkbox"/><br>5 |                  |
